# Supplementary material for: Population scale mapping of transposable element diversity reveals links to gene regulation and epigenomic variation
Source: eLife journal article supplement (doi:10.7554/elife.20777), 2016-12-02
Supplement: supp [file elife-20777-supp-v1.zip]

**A**

**Frequency of TE insertions  
in random 300 kb regions**

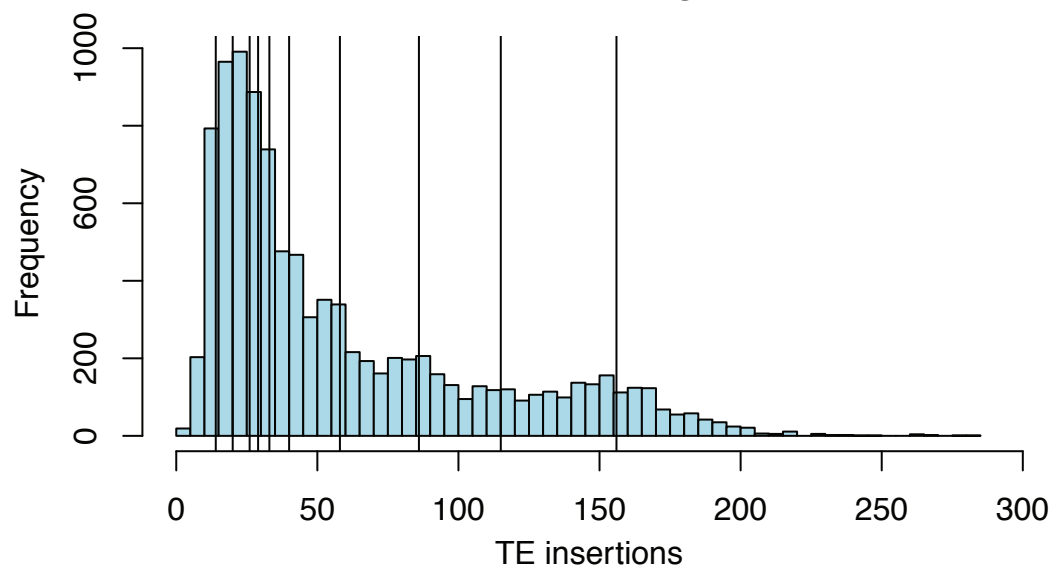**B**

| chr  | start    | stop     | KEE   | TE variants | p-value |
|------|----------|----------|-------|-------------|---------|
| chr1 | 6900000  | 7200000  | kee1  | 29          | 0.6304  |
| chr2 | 4025000  | 4325000  | kee2  | 156         | 0.0675  |
| chr3 | 1800000  | 2100000  | kee3  | 33          | 0.5672  |
| chr3 | 2950000  | 3250000  | kee4  | 14          | 0.9172  |
| chr3 | 16537500 | 16837500 | kee5  | 115         | 0.1659  |
| chr3 | 22375000 | 22675000 | kee6  | 40          | 0.4927  |
| chr4 | 10900000 | 11200000 | kee7  | 58          | 0.3589  |
| chr4 | 15387500 | 15687500 | kee8  | 26          | 0.6824  |
| chr5 | 4612500  | 4912500  | kee9  | 20          | 0.802   |
| chr5 | 10162500 | 10462500 | kee10 | 86          | 0.2455  |
