# Supplementary material for: Population scale mapping of transposable element diversity reveals links to gene regulation and epigenomic variation
Source: eLife journal article supplement (doi:10.7554/elife.20777), 2016-12-02

**A** Length distribution of all Col-0 TEs

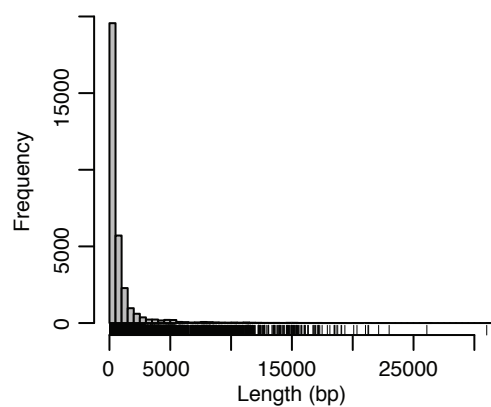

**B** Length distribution of TE variants

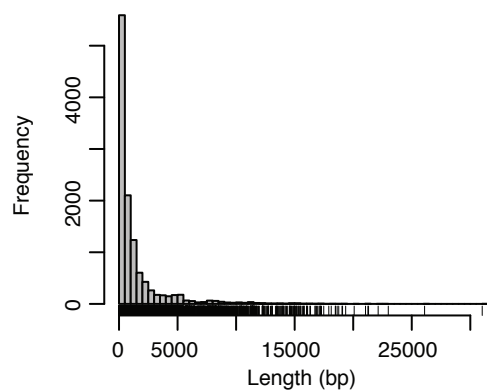

**C** TE length distribution

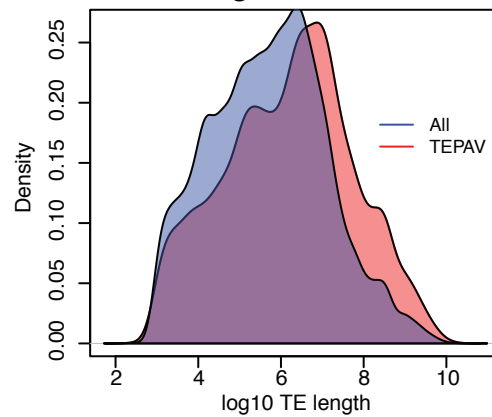

Supplement: supp [file elife-20777-supp-v1.zip]
