# Supplementary figures and images for: Population scale mapping of transposable element diversity reveals links to gene regulation and epigenomic variation
Source: eLife journal article supplement (doi:10.7554/elife.20777), 2016-12-02

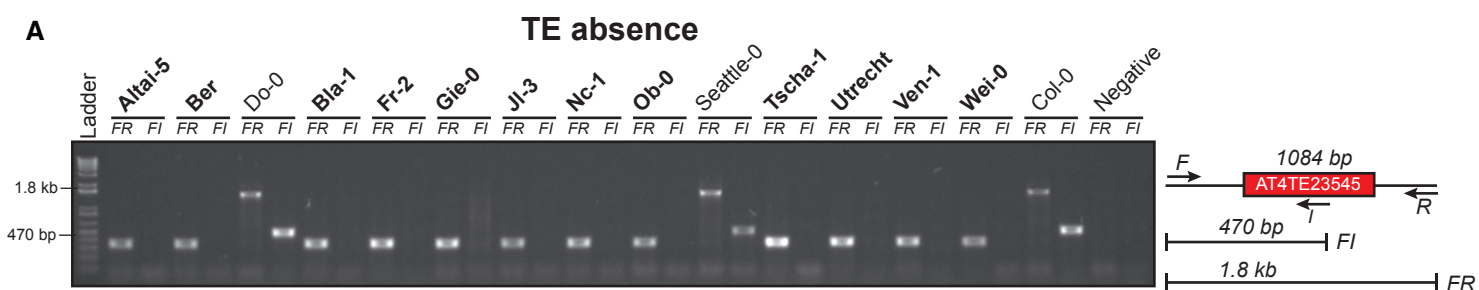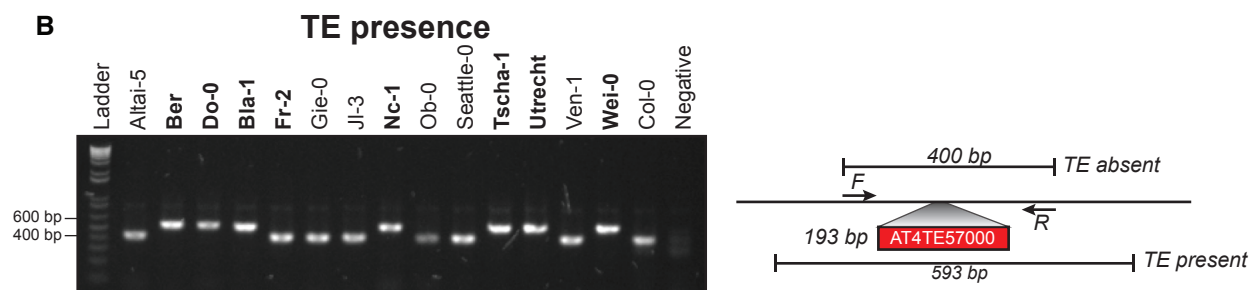

Supplement: supp [file elife-20777-supp-v1.zip]

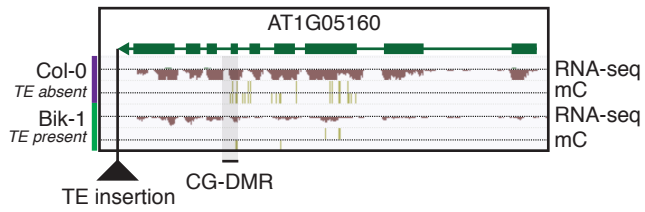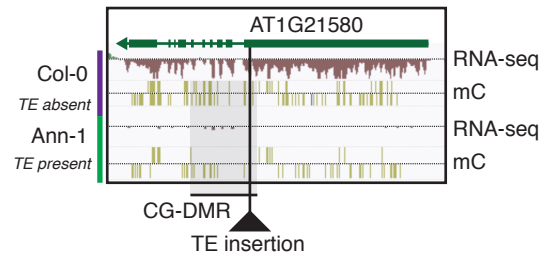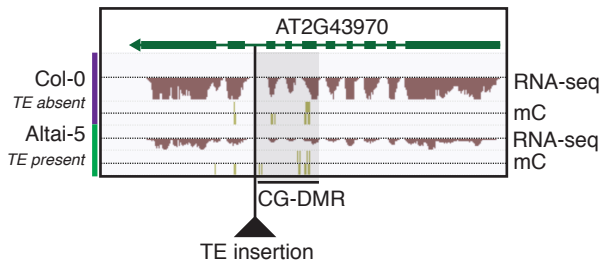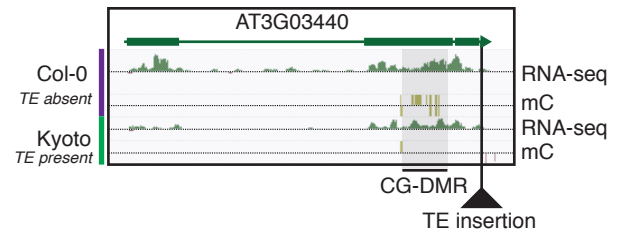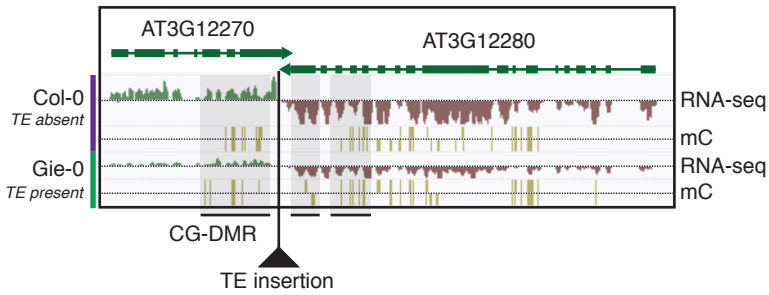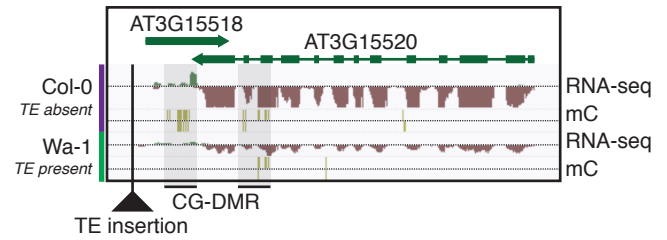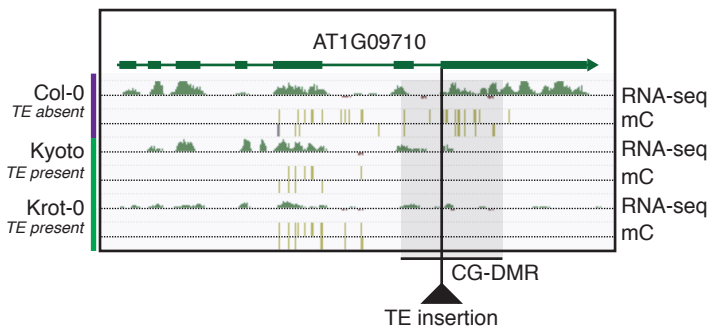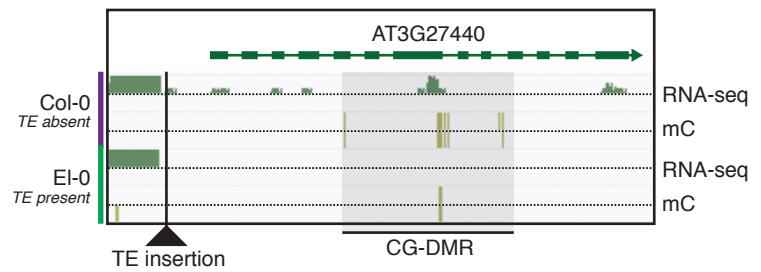

Supplement: supp [file elife-20777-supp-v1.zip]

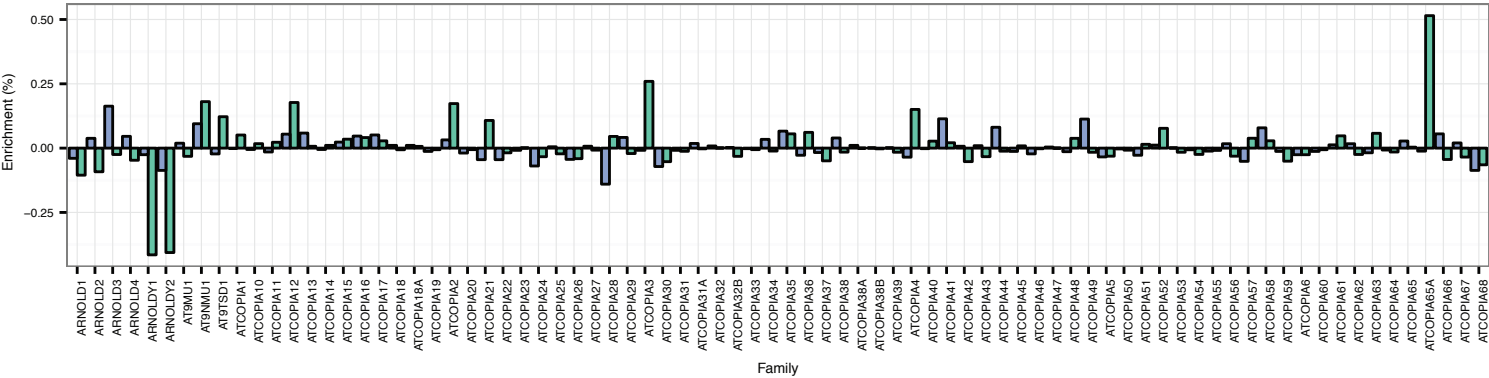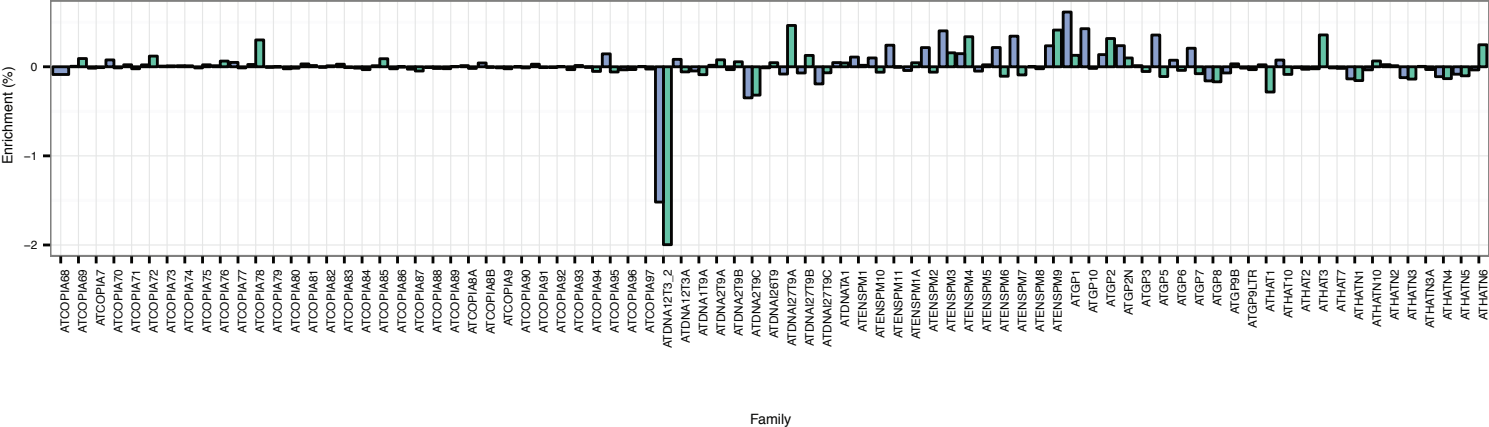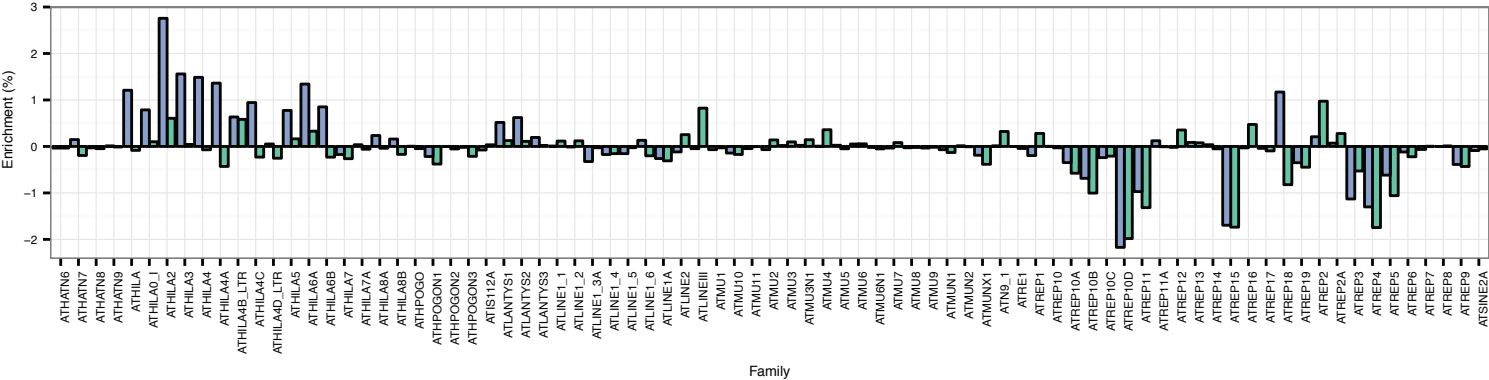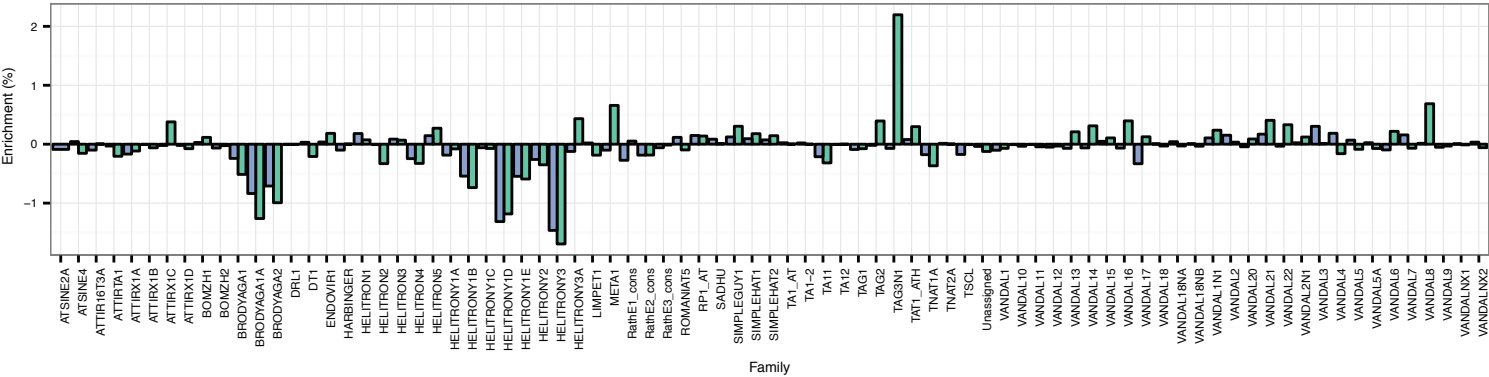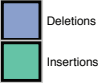

Supplement: supp [file elife-20777-supp-v1.zip]

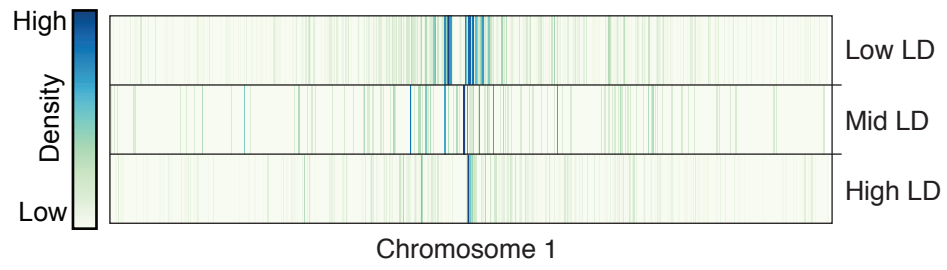

Supplement: supp [file elife-20777-supp-v1.zip]

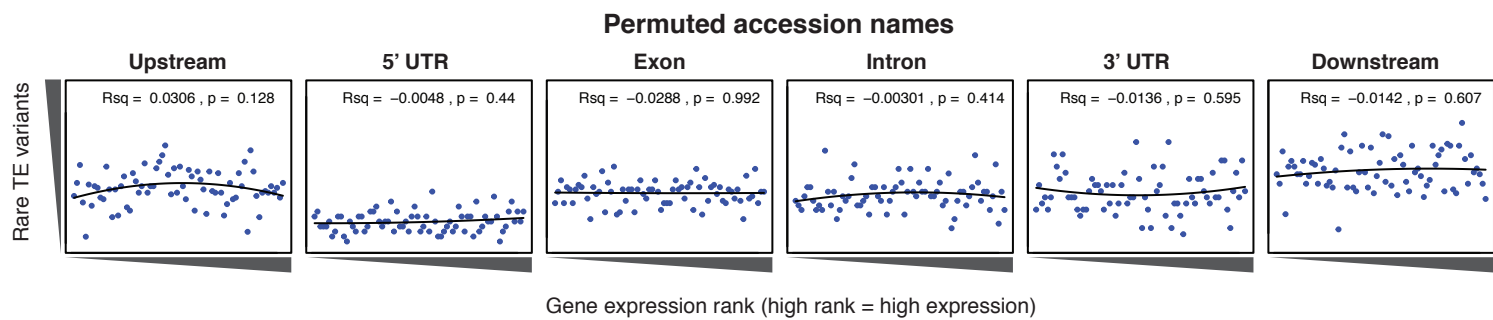

Supplement: supp [file elife-20777-supp-v1.zip]

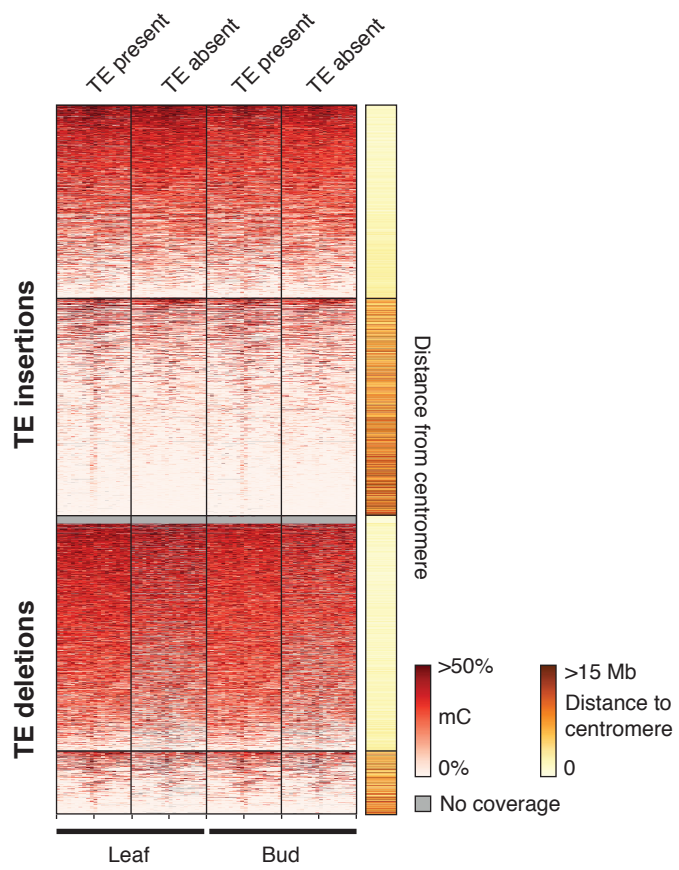

Supplement: supp [file elife-20777-supp-v1.zip]

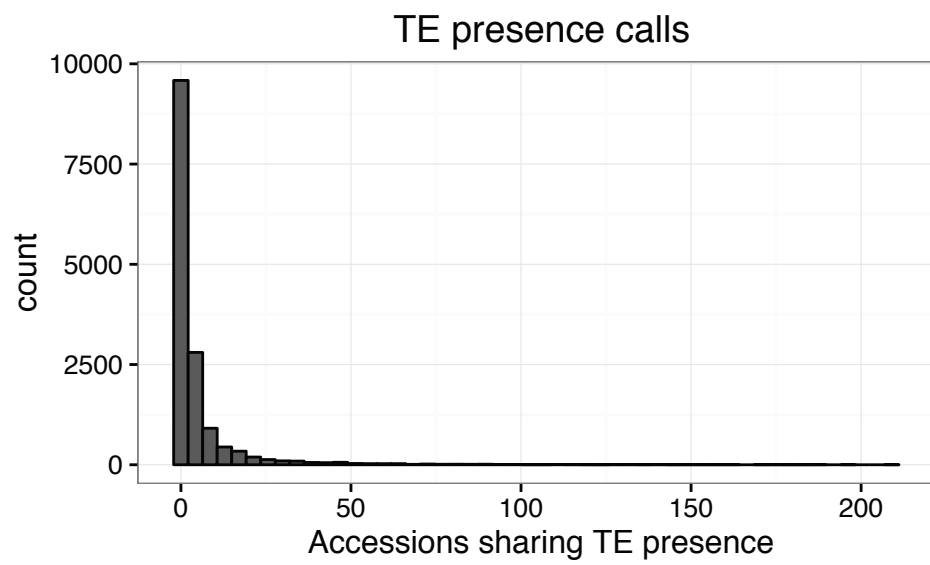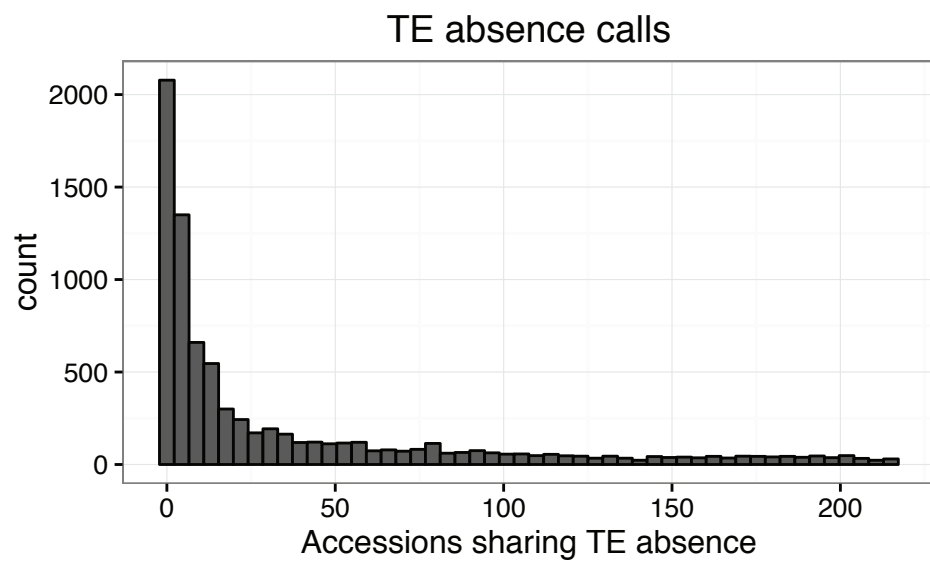

Supplement: supp [file elife-20777-supp-v1.zip]

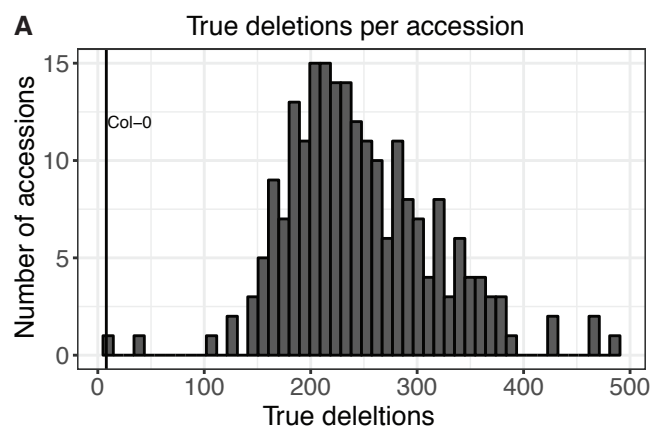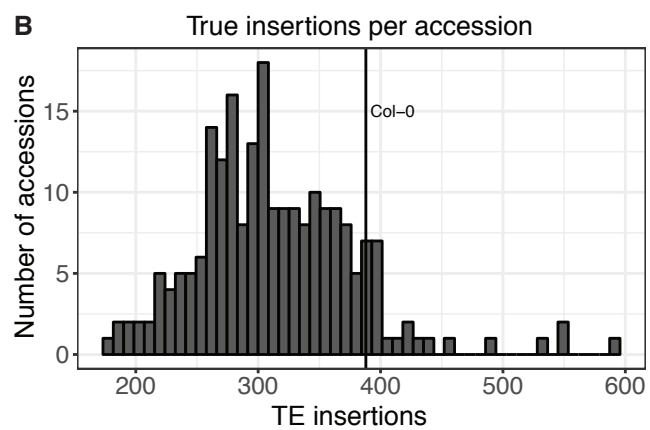

Supplement: supp [file elife-20777-supp-v1.zip]

# Basho TE allele frequencies

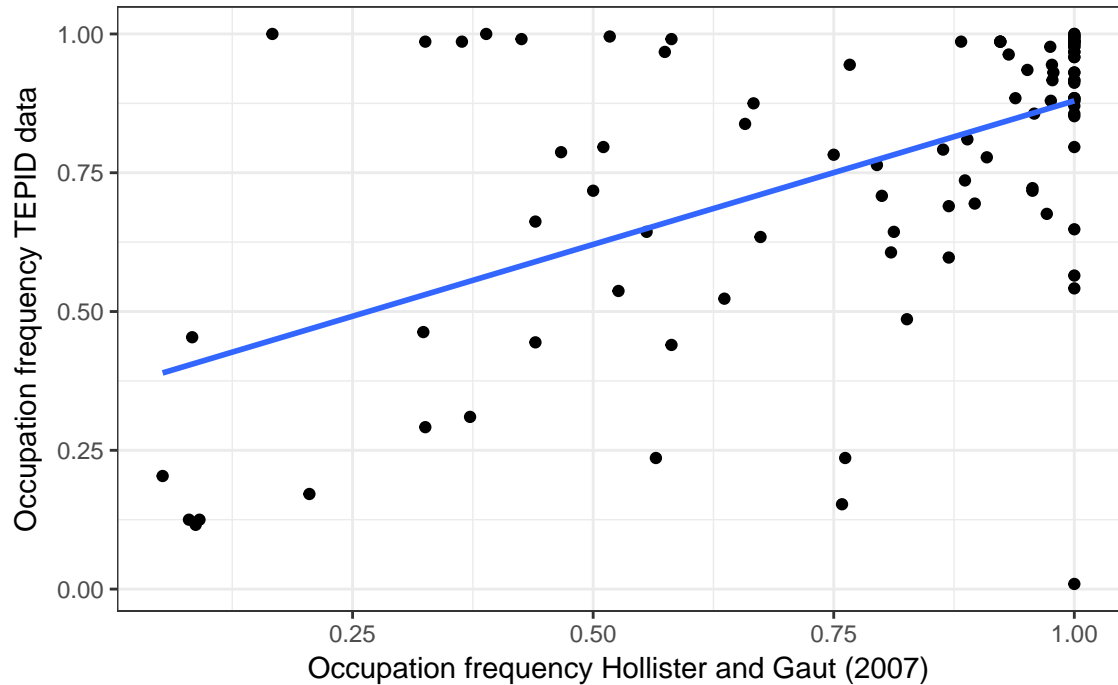

Supplement: supp [file elife-20777-supp-v1.zip]

**A**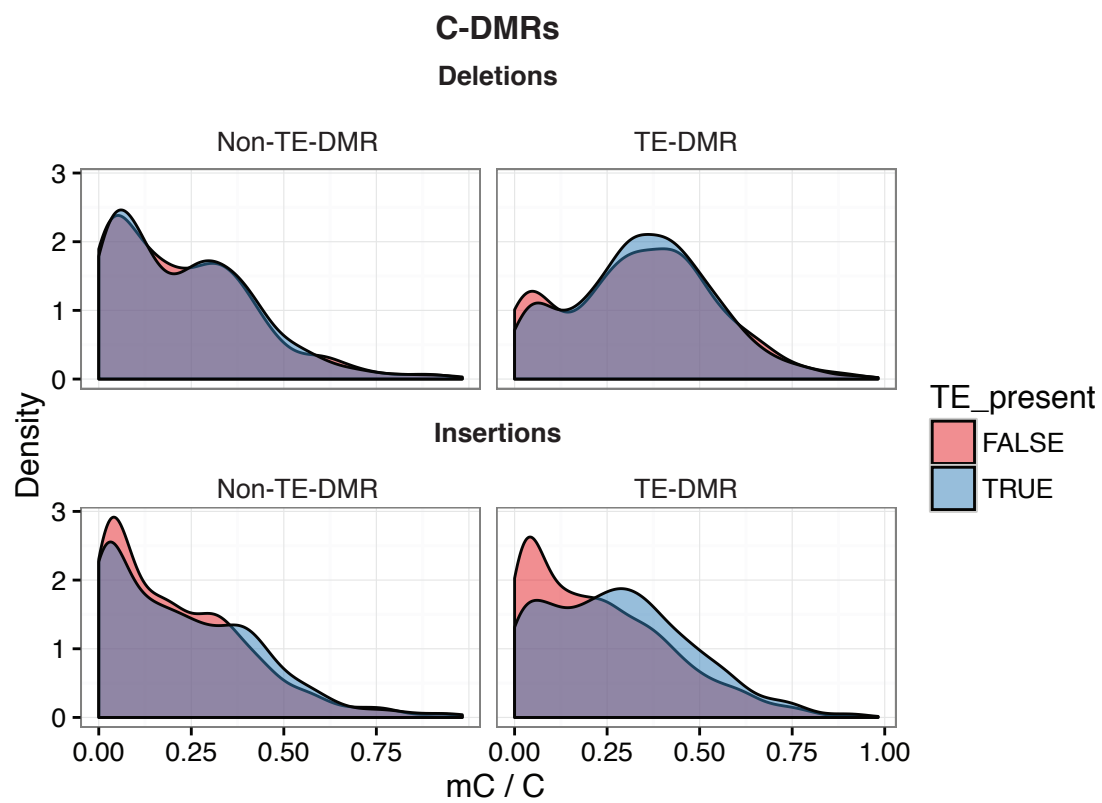**B**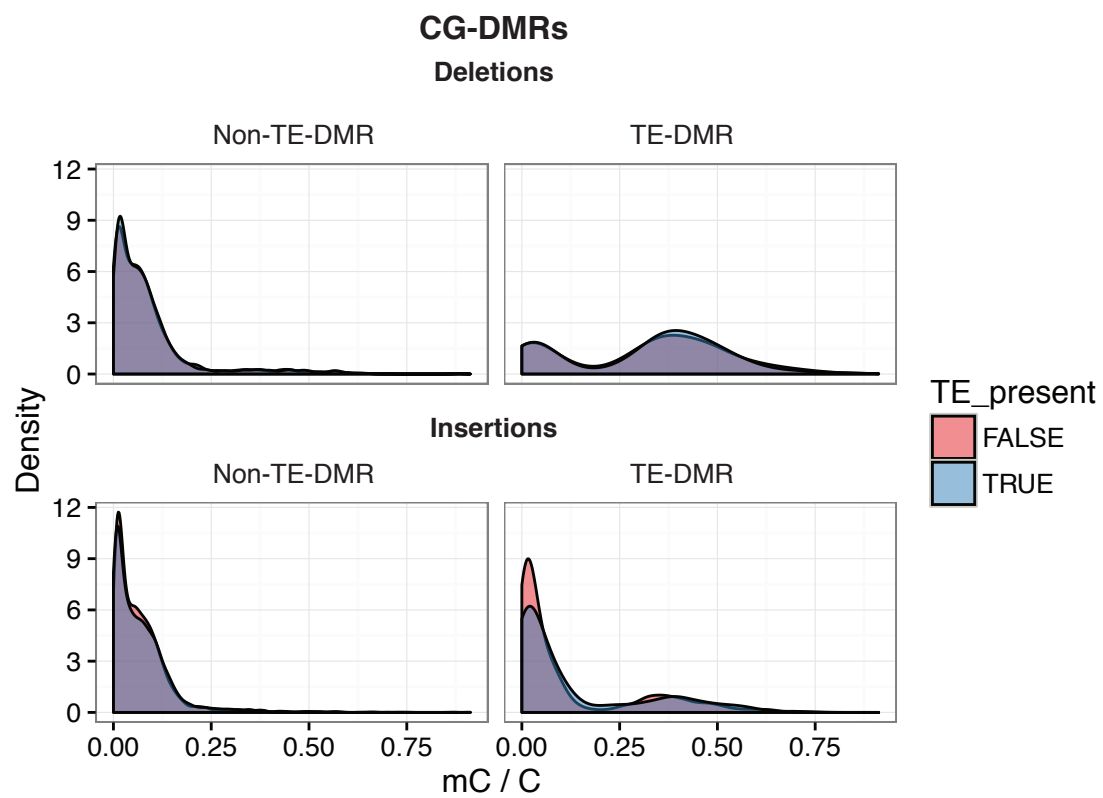

Supplement: supp [file elife-20777-supp-v1.zip]

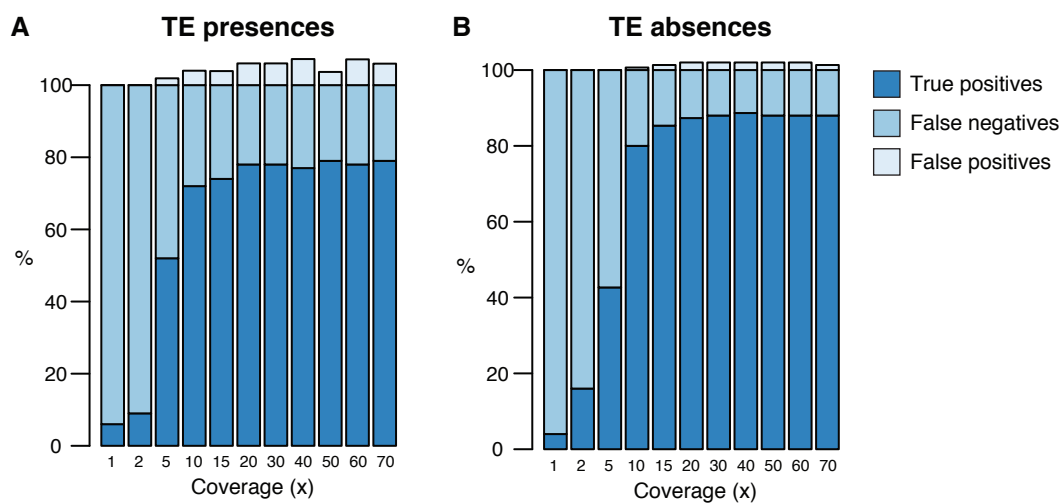

Supplement: supp [file elife-20777-supp-v1.zip]

## TE calls due to TEPID refinement step

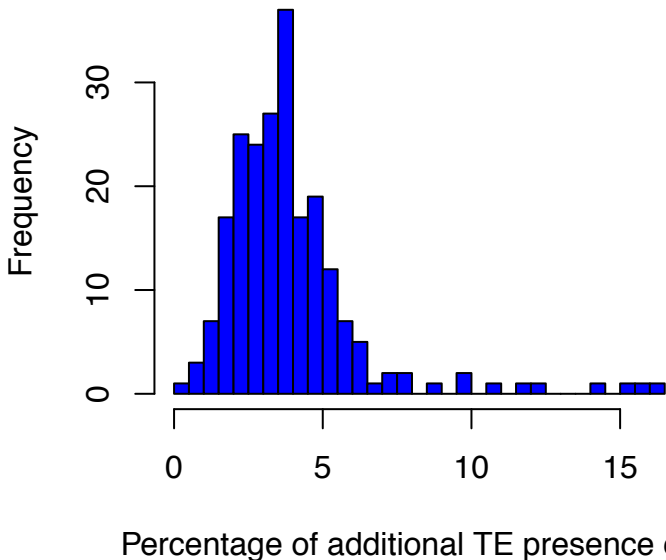

Supplement: supp [file elife-20777-supp-v1.zip]

**A** TE absences

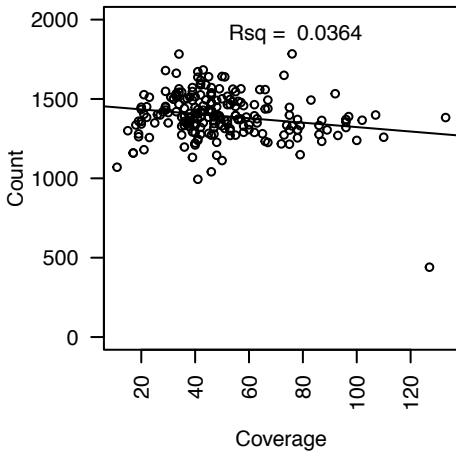

**B** TE presences

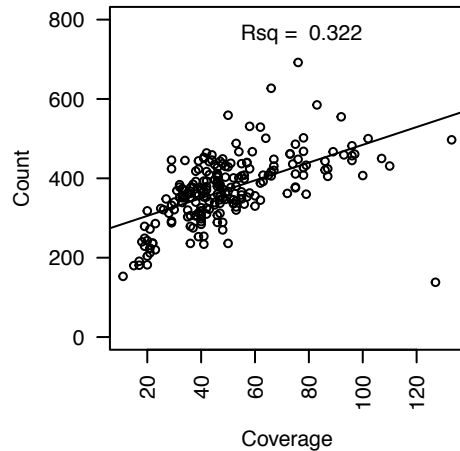

**C** Additional presence calls from TEPID refine step

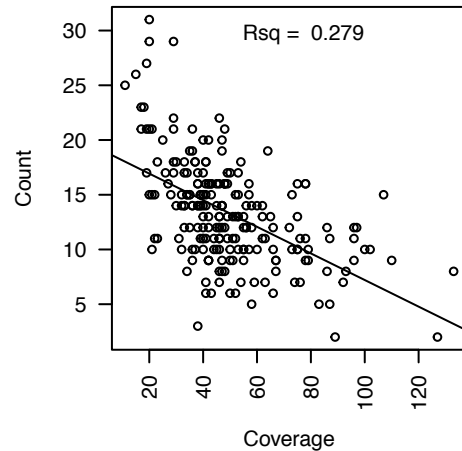

Supplement: supp [file elife-20777-supp-v1.zip]

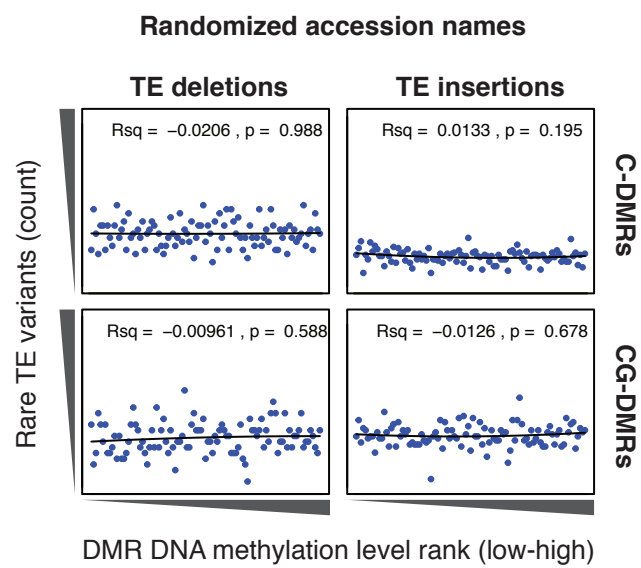

Supplement: supp [file elife-20777-supp-v1.zip]

A

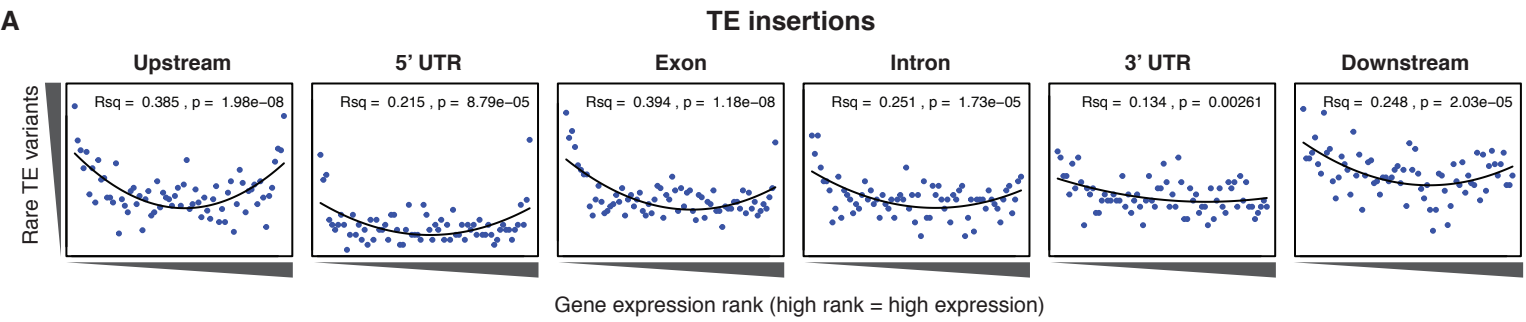

B

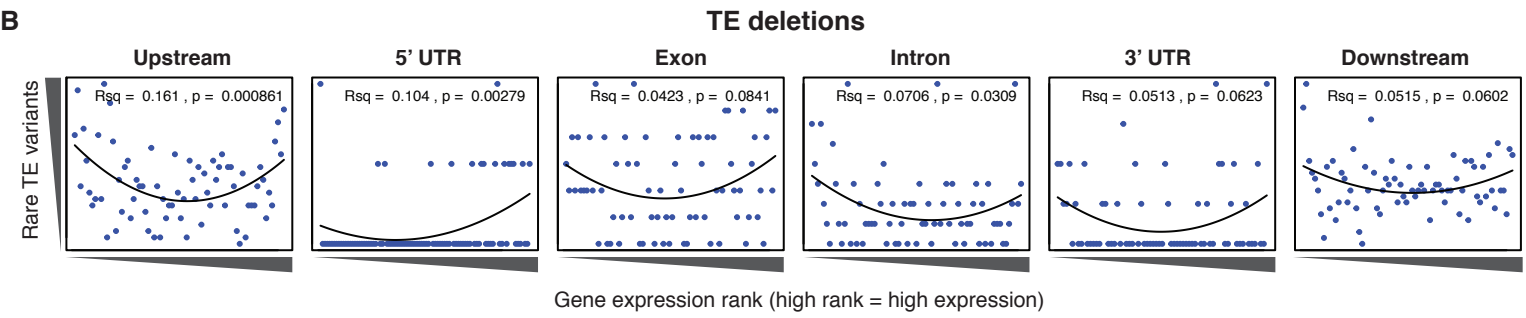

Supplement: supp [file elife-20777-supp-v1.zip]
